# Supplementary material for: yDNA versus yyDNA pyrimidines: computational analysis of the effects of unidirectional ring expansion on the preferred sugar–base orientation, hydrogen-bonding interactions and stacking abilities
Source: Royal Society of Chemistry journal article supplement (doi:10.1039/c2cp43910g), 2012-12-21
Supplement: c2cp43910g.pdf [file c2cp43910g.pdf]

## **yDNA versus yyDNA pyrimidines: Computational analysis of the effects of unidirectional ring expansion on the preferred sugar–base orientation, hydrogen-bonding interactions and stacking abilities**

Purshotam Sharma, Linda A. Lait and Stacey D. Wetmore\*

*Department of Chemistry and Biochemistry, University of Lethbridge, 4401 University Drive West, Lethbridge, Alberta, Canada T1K 3M4*

\*Corresponding author S.D.W.: E-mail: stacey.wetmore@uleth.ca; Phone: 403-329-2323; Fax: 403-329-2057.

### **Supporting Information (10 pages)**

1. Tables S1-S4. Cartesian coordinates of hydrogen-bonded base pairs containing expanded pyrimidines.....S2
2. Tables S5-S12. MP2/6-31G(d) optimized monomers used to build dimers for center-of-mass stacking calculations.....S6

**Table S1-S4. Cartesian coordinates of hydrogen-bonded base pairs containing expanded pyrimidines.**

**Table S1. A:yT**

---

Calculated energy (in Hartrees)= -1114.47875470

---

| Atom | X           | Y           | Z           |
|------|-------------|-------------|-------------|
| C    | -6.41802500 | -2.11676600 | 0.00001200  |
| H    | -5.70117200 | -2.93874300 | 0.00249000  |
| N    | -5.65885600 | -0.87674800 | 0.00097500  |
| C    | -6.13504700 | 0.41993200  | 0.00250400  |
| H    | -7.19832000 | 0.62273900  | 0.00361100  |
| N    | -5.19320600 | 1.33462000  | 0.00255800  |
| C    | -4.02206400 | 0.60005600  | 0.00091300  |
| C    | -2.65942000 | 0.97786500  | 0.00017100  |
| N    | -2.25195600 | 2.25777100  | 0.00110100  |
| H    | -1.25760900 | 2.48587000  | 0.00002700  |
| H    | -2.94671900 | 2.98644900  | 0.00205200  |
| N    | -1.73810400 | -0.01334900 | -0.00148300 |
| C    | -2.14003300 | -1.29978700 | -0.00222500 |
| H    | -1.33124800 | -2.02709700 | -0.00336000 |
| N    | -3.38582200 | -1.77010700 | -0.00164400 |
| C    | -4.28438300 | -0.77257100 | -0.00009700 |
| H    | -7.04918900 | -2.18728900 | 0.89045000  |
| H    | -7.04470400 | -2.18895900 | -0.89348900 |
| O    | 0.66947400  | 2.71382700  | -0.00201100 |
| C    | 1.45880500  | 1.76824600  | -0.00159600 |
| N    | 2.82288600  | 1.97610800  | -0.00075900 |
| N    | 1.06649800  | 0.44994500  | -0.00212800 |
| C    | 3.77422500  | 0.96192700  | -0.00003500 |
| H    | 3.10520800  | 2.94580700  | -0.00020900 |
| C    | 1.89381300  | -0.67124800 | -0.00125800 |
| H    | 0.03186900  | 0.27675900  | -0.00214400 |
| C    | 3.34134800  | -0.37353300 | -0.00029100 |
| C    | 5.14797900  | 1.24257500  | 0.00090600  |
| O    | 1.42289800  | -1.80132800 | -0.00134700 |
| C    | 4.28189800  | -1.41106400 | 0.00042600  |
| C    | 6.05998800  | 0.19613000  | 0.00160100  |
| H    | 5.49178700  | 2.27326400  | 0.00109600  |
| C    | 5.64925700  | -1.15126400 | 0.00136800  |
| H    | 3.90206200  | -2.42797700 | 0.00022100  |
| H    | 7.12231900  | 0.42735200  | 0.00234200  |
| C    | 6.66712100  | -2.26676300 | 0.00205800  |
| H    | 7.31646400  | -2.21595700 | 0.88362700  |
| H    | 6.18081000  | -3.24540700 | 0.00253300  |
| H    | 7.31660800  | -2.21690900 | -0.87946600 |

---

**Table S2.** A:yyT

---

Calculated energy (in Hartrees)= -1268.12531063

---

| Atom | X           | Y           | Z           |
|------|-------------|-------------|-------------|
| N    | -1.55221000 | 2.26526800  | 0.00095000  |
| C    | -2.22580300 | -0.05206300 | -0.00050000 |
| C    | -2.58208300 | 1.32714300  | 0.00048700  |
| C    | -0.79694500 | -0.44055800 | -0.00127100 |
| O    | -0.40320100 | -1.59951400 | -0.00242500 |
| N    | 0.10042700  | 0.62169600  | -0.00051200 |
| H    | 1.12196900  | 0.38202700  | -0.00187100 |
| C    | -0.20743600 | 1.96363800  | 0.00072600  |
| O    | 0.64506300  | 2.85251200  | 0.00185800  |
| C    | -3.91252100 | 1.70211900  | 0.00108300  |
| C    | -4.93315600 | 0.72252000  | 0.00088200  |
| H    | -4.18397400 | 2.75470700  | 0.00180300  |
| C    | -3.21234100 | -1.01817800 | -0.00084400 |
| C    | -4.58051300 | -0.66883900 | -0.00009500 |
| H    | -2.90559300 | -2.05955300 | -0.00162800 |
| H    | -1.76284600 | 3.25305200  | 0.00207400  |
| C    | -6.94453300 | -1.29995400 | 0.00052700  |
| C    | -7.27969300 | 0.08595500  | 0.00143000  |
| C    | -5.61194100 | -1.64873800 | -0.00022600 |
| C    | -6.31442400 | 1.06273000  | 0.00162900  |
| H    | -8.32909300 | 0.37080500  | 0.00195100  |
| H    | -5.32462500 | -2.69743700 | -0.00091400 |
| H    | -6.59734100 | 2.11199300  | 0.00232700  |
| C    | -8.04056400 | -2.33636000 | 0.00057300  |
| H    | -8.68400800 | -2.23457600 | 0.88243600  |
| H    | -8.68605800 | -2.23244800 | -0.87947100 |
| H    | -7.63205400 | -3.35022000 | -0.00110500 |
| H    | 8.01446100  | -2.55554200 | -0.88959000 |
| C    | 7.39384300  | -2.44036500 | 0.00356200  |
| H    | 6.62339500  | -3.21232000 | 0.00670400  |
| N    | 6.71995500  | -1.15210400 | 0.00272800  |
| H    | 8.01851100  | -2.55211300 | 0.89431700  |
| C    | 7.28222100  | 0.10961700  | 0.00346100  |
| C    | 5.35560500  | -0.95566100 | 0.00016500  |
| H    | 8.35673200  | 0.24058600  | 0.00547500  |
| N    | 6.40387800  | 1.08551500  | 0.00177700  |
| C    | 5.18603700  | 0.43130900  | -0.00047400 |
| N    | 4.39221200  | -1.89075900 | -0.00124600 |
| C    | 3.85182300  | 0.89990500  | -0.00299500 |
| C    | 3.18090000  | -1.33790700 | -0.00328100 |
| N    | 3.53132500  | 2.20415700  | -0.00532000 |
| N    | 2.86605800  | -0.02723100 | -0.00416400 |
| H    | 2.32525100  | -2.00941300 | -0.00425500 |
| H    | 2.55459000  | 2.49828300  | -0.00224400 |
| H    | 4.27341400  | 2.88452300  | -0.00001200 |

---

**Table S3.** G:yC

---

Calculated energy (in Hartrees)= -1209.15821051

---

| Atom | X           | Y           | Z           |
|------|-------------|-------------|-------------|
| N    | 5.95821500  | -0.43088500 | 0.02767200  |
| C    | 6.29057800  | 0.91664700  | 0.04714900  |
| H    | 7.32523700  | 1.23389000  | 0.06677500  |
| N    | 5.25335400  | 1.71268400  | 0.03843600  |
| C    | 4.16747500  | 0.85531700  | 0.01193900  |
| C    | 2.76224400  | 1.11596100  | -0.00685900 |
| O    | 2.17868400  | 2.21338300  | -0.00289600 |
| N    | 2.01816300  | -0.07754700 | -0.03193600 |
| H    | 0.98942500  | 0.03539400  | -0.03896900 |
| C    | 2.53911200  | -1.35103400 | -0.03804700 |
| N    | 1.64985400  | -2.36490800 | -0.07326500 |
| H    | 0.63685000  | -2.21691300 | -0.04491900 |
| H    | 2.02786300  | -3.29667200 | -0.04341300 |
| N    | 3.84059400  | -1.60552100 | -0.01855900 |
| C    | 4.58510500  | -0.48054000 | 0.00505200  |
| C    | 6.85211900  | -1.57482900 | 0.03270200  |
| H    | 7.45423900  | -1.59731300 | 0.94630300  |
| H    | 6.23749800  | -2.47463500 | -0.01192300 |
| H    | 7.51889300  | -1.55205300 | -0.83457700 |
| H    | 0.48694000  | 2.43035200  | -0.02833900 |
| N    | -0.54383200 | 2.58948300  | -0.03789500 |
| C    | -1.37449500 | 1.53936100  | -0.02419700 |
| H    | -0.89423100 | 3.53318700  | -0.01918600 |
| N    | -0.87407100 | 0.31321800  | -0.02554800 |
| N    | -2.72571500 | 1.78218100  | -0.01208900 |
| C    | -1.69530900 | -0.78858100 | -0.01226300 |
| C    | -3.65492400 | 0.74168600  | 0.00010200  |
| H    | -3.05890100 | 2.73420800  | -0.01462500 |
| O    | -1.22386100 | -1.93476200 | -0.01062000 |
| C    | -3.16234500 | -0.56992200 | 0.00064800  |
| C    | -5.04103700 | 0.99890400  | 0.01171700  |
| C    | -4.05934100 | -1.64522800 | 0.01317400  |
| C    | -5.89455200 | -0.10077200 | 0.02391600  |
| C    | -5.43311000 | -1.43112800 | 0.02515500  |
| H    | -3.64164500 | -2.64664500 | 0.01313700  |
| H    | -6.96705100 | 0.08238200  | 0.03278100  |
| C    | -6.41347300 | -2.57983700 | 0.04077800  |
| H    | -5.89490500 | -3.54151300 | 0.02111800  |
| H    | -7.04217200 | -2.55750000 | 0.93847000  |
| H    | -7.08604900 | -2.54439900 | -0.82390600 |
| C    | -5.57042400 | 2.41264900  | 0.01072600  |
| H    | -5.23684600 | 2.97802700  | 0.89126700  |

|   |             |            |             |
|---|-------------|------------|-------------|
| H | -5.25281500 | 2.97084700 | -0.88024100 |
| H | -6.66258900 | 2.41752300 | 0.02052600  |

---

**Table S4.** G:yyC

---

Calculated energy (in Hartrees)=-1323.48402481

---

| Atom | X           | Y           | Z           |
|------|-------------|-------------|-------------|
| C    | 2.70242900  | 1.37130600  | -0.00605900 |
| C    | 0.34204800  | 1.90451900  | -0.02204700 |
| N    | -0.59872000 | 2.85546500  | -0.02986200 |
| H    | -1.60666100 | 2.58516600  | -0.01973300 |
| H    | -0.35439900 | 3.83214200  | -0.01063900 |
| N    | -0.02553600 | 0.63008400  | -0.02625200 |
| C    | 0.90680900  | -0.37667300 | -0.01882500 |
| O    | 0.56277400  | -1.56676600 | -0.02060700 |
| C    | 4.02699700  | 1.76225900  | 0.00245100  |
| C    | 5.05348000  | 0.78896300  | 0.00945300  |
| H    | 4.29121200  | 2.81713400  | 0.00396600  |
| C    | 3.34037000  | -0.96329500 | -0.00110400 |
| C    | 4.70661400  | -0.60420300 | 0.00790100  |
| H    | 3.04141300  | -2.00674600 | -0.00289600 |
| C    | 2.34580500  | -0.00510500 | -0.00812000 |
| N    | 1.65726500  | 2.29623000  | -0.01239200 |
| H    | 1.88414100  | 3.28004100  | -0.01368000 |
| C    | 6.43274400  | 1.13707400  | 0.01823700  |
| C    | 7.40318500  | 0.16568100  | 0.02516500  |
| H    | 6.71018900  | 2.18786200  | 0.01943900  |
| C    | 5.74419800  | -1.57789800 | 0.01531800  |
| C    | 7.07483000  | -1.22192000 | 0.02390500  |
| H    | 8.45104100  | 0.45583800  | 0.03185100  |
| H    | 5.46267600  | -2.62813200 | 0.01406600  |
| C    | 8.17641700  | -2.25254700 | 0.03193500  |
| H    | 8.82590700  | -2.14696400 | -0.84498600 |
| H    | 8.81462200  | -2.14519200 | 0.91688200  |
| H    | 7.77343400  | -3.26848800 | 0.03035400  |
| H    | -8.09194900 | -2.16266100 | 0.96270200  |
| C    | -7.50862000 | -2.06915000 | 0.04141900  |
| N    | -6.74156100 | -0.83648200 | 0.03441500  |
| H    | -8.18612900 | -2.11059500 | -0.81670600 |
| H    | -6.80265700 | -2.89818700 | -0.01929600 |
| C    | -7.21555700 | 0.46797100  | 0.05742100  |
| C    | -5.37123800 | -0.73951400 | 0.00773700  |
| H    | -8.27807200 | 0.67293000  | 0.08072400  |
| N    | -6.26911700 | 1.37002300  | 0.04702500  |
| N    | -4.51094400 | -1.77872100 | -0.02017300 |
| C    | -5.09820800 | 0.63331700  | 0.01584700  |

---

|   |             |             |             |
|---|-------------|-------------|-------------|
| C | -3.24429700 | -1.38693200 | -0.04309300 |
| C | -3.72884800 | 1.04194200  | -0.00703400 |
| N | -2.86203300 | -0.06519400 | -0.03611000 |
| N | -2.25142500 | -2.29942200 | -0.08310300 |
| O | -3.26488300 | 2.19522000  | -0.00341300 |
| H | -1.85154000 | 0.15757900  | -0.04712000 |
| H | -1.26119600 | -2.04119300 | -0.05724500 |
| H | -2.52560500 | -3.26679700 | -0.05340300 |

---

**Table S5-S12. MP2/6-31G(d) optimized monomers used to build dimers for center-of-mass stacking calculations.**

**Table S5. Thymine (T).**

---

Calculated energy (in Hartrees)= -452.80601731

---

| Atom | X           | Y           | Z           |
|------|-------------|-------------|-------------|
| N    | 0.14415400  | -1.66631700 | 0.00000000  |
| C    | -1.08610300 | -1.04128900 | 0.00000000  |
| H    | -1.94395700 | -1.70796900 | 0.00000000  |
| C    | -1.21462700 | 0.30706100  | 0.00000000  |
| C    | -2.52945400 | 1.02192800  | 0.00000000  |
| H    | -2.61589200 | 1.66653800  | 0.87905200  |
| H    | -2.61589200 | 1.66653800  | -0.87905200 |
| H    | -3.36103700 | 0.31207600  | 0.00000000  |
| C    | 0.00000000  | 1.12147500  | 0.00000000  |
| O    | 0.02537700  | 2.35108200  | 0.00000000  |
| N    | 1.19251000  | 0.38116700  | 0.00000000  |
| H    | 2.05291600  | 0.92395400  | 0.00000000  |
| C    | 1.35681800  | -0.99517800 | 0.00000000  |
| O    | 2.44355100  | -1.56009500 | 0.00000000  |
| H    | 0.21597900  | -2.67696300 | 0.00000000  |

---

**Table S6. y-thymine (yT).**

---

Calculated energy (in Hartrees)= -566.80370113

---

| Atom | X | Y | Z |
|------|---|---|---|
|------|---|---|---|

|   |             |             |            |
|---|-------------|-------------|------------|
| N | 0.28292100  | -1.62395900 | 0.00000000 |
| C | 0.00000000  | 0.76807700  | 0.00000000 |
| C | 0.84536200  | -0.35164900 | 0.00000000 |
| C | -1.46319400 | 0.58467300  | 0.00000000 |
| O | -2.28821200 | 1.49348100  | 0.00000000 |
| N | -1.86198200 | -0.75213300 | 0.00000000 |
| H | -2.86512100 | -0.92104300 | 0.00000000 |
| C | -1.06938200 | -1.89743600 | 0.00000000 |
| O | -1.53173600 | -3.03120200 | 0.00000000 |
| C | 2.23581100  | -0.17552100 | 0.00000000 |
| C | 2.76379500  | 1.11073000  | 0.00000000 |
| H | 2.89299400  | -1.04302000 | 0.00000000 |
| C | 0.54298800  | 2.05785200  | 0.00000000 |
| C | 1.92130300  | 2.23154500  | 0.00000000 |
| H | -0.14191000 | 2.90156300  | 0.00000000 |
| H | 2.34614200  | 3.23143800  | 0.00000000 |
| H | 0.87763500  | -2.44598300 | 0.00000000 |
| H | 3.84317000  | 1.24183000  | 0.00000000 |

**Table S7.** yy-thymine (yyT).

Calculated energy (in Hartrees)= -719.95956709

| Atom | X           | Y           | Z          |
|------|-------------|-------------|------------|
| N    | 2.36141600  | 0.42347800  | 0.00000000 |
| C    | 0.00000000  | 0.93246500  | 0.00000000 |
| C    | 1.04324400  | -0.03063400 | 0.00000000 |
| C    | 0.32582900  | 2.37493500  | 0.00000000 |
| O    | -0.50173300 | 3.28106000  | 0.00000000 |
| N    | 1.69198500  | 2.64397800  | 0.00000000 |
| H    | 1.95769300  | 3.62582700  | 0.00000000 |
| C    | 2.75676700  | 1.74312000  | 0.00000000 |
| O    | 3.92784000  | 2.10069000  | 0.00000000 |
| C    | 0.74044200  | -1.38055800 | 0.00000000 |
| C    | -0.60478900 | -1.81271800 | 0.00000000 |
| H    | 1.54050200  | -2.12099100 | 0.00000000 |
| C    | -1.32120900 | 0.53032700  | 0.00000000 |
| C    | -1.66022300 | -0.84007600 | 0.00000000 |
| H    | -2.09545500 | 1.29584700  | 0.00000000 |
| H    | 3.12738100  | -0.24209800 | 0.00000000 |
| H    | -4.34233900 | -2.95500600 | 0.00000000 |
| C    | -3.30596500 | -2.62599800 | 0.00000000 |
| C    | -2.26678600 | -3.58840900 | 0.00000000 |
| C    | -3.01058200 | -1.28001100 | 0.00000000 |
| C    | -0.94686000 | -3.19126300 | 0.00000000 |
| H    | -2.51438400 | -4.64740700 | 0.00000000 |
| H    | -3.80552100 | -0.53614700 | 0.00000000 |

---

|   |             |             |            |
|---|-------------|-------------|------------|
| H | -0.14974700 | -3.93328900 | 0.00000000 |
|---|-------------|-------------|------------|

---

**Table S8.** Cytosine (C).

---

Calculated energy (in Hartrees)= -393.76465490

---

| Atom | X           | Y           | Z          |
|------|-------------|-------------|------------|
| N    | -1.20108300 | -0.98917800 | 0.00000000 |
| C    | -0.06095200 | -1.72627900 | 0.00000000 |
| H    | -0.17406900 | -2.80633000 | 0.00000000 |
| C    | 1.14480600  | -1.09954900 | 0.00000000 |
| H    | 2.07294400  | -1.65835900 | 0.00000000 |
| C    | 1.10708900  | 0.33798200  | 0.00000000 |
| N    | 2.27881800  | 1.02414500  | 0.00000000 |
| H    | 2.23508000  | 2.03358800  | 0.00000000 |
| H    | 3.17527400  | 0.56464200  | 0.00000000 |
| N    | 0.00000000  | 1.05811100  | 0.00000000 |
| C    | -1.22732900 | 0.43056000  | 0.00000000 |
| O    | -2.31501300 | 0.99848200  | 0.00000000 |
| H    | -2.11496600 | -1.42923500 | 0.00000000 |

---

**Table S9.** y-cytosine (yC).

---

Calculated energy (in Hartrees)= -586.09190502

---

| Atom | X           | Y           | Z          |
|------|-------------|-------------|------------|
| C    | 0.00000000  | 0.60177900  | 0.00000000 |
| C    | 1.93078600  | -0.82464500 | 0.00000000 |
| N    | 3.29198900  | -0.88279100 | 0.00000000 |
| H    | 3.70416800  | -1.80394200 | 0.00000000 |
| H    | 3.88902300  | -0.07154100 | 0.00000000 |
| N    | 1.25827900  | -1.94461600 | 0.00000000 |
| C    | -0.13601700 | -1.90081500 | 0.00000000 |
| O    | -0.81087600 | -2.93118800 | 0.00000000 |
| C    | -0.57479100 | 1.88736600  | 0.00000000 |
| C    | -1.96661600 | 1.96626100  | 0.00000000 |
| C    | -2.17940100 | -0.44162800 | 0.00000000 |
| C    | -2.76819100 | 0.81588500  | 0.00000000 |
| H    | -2.43509000 | 2.94915000  | 0.00000000 |
| H    | -2.76568200 | -1.35621400 | 0.00000000 |



---

|   |             |             |             |
|---|-------------|-------------|-------------|
| H | -3.85077700 | 0.91395700  | 0.00000000  |
| C | -0.78430900 | -0.55894500 | 0.00000000  |
| N | 1.38406700  | 0.43380500  | 0.00000000  |
| H | 1.98141000  | 1.25074600  | 0.00000000  |
| C | 0.29176900  | 3.11814600  | 0.00000000  |
| H | 0.93525600  | 3.16154500  | 0.88721900  |
| H | 0.93525600  | 3.16154500  | -0.88721900 |
| H | -0.32628200 | 4.01903600  | 0.00000000  |

---

**Table S10.** yy-cytosine (yyC)

---

Calculated energy (in Hartrees)= -700.07570399

---

| Atom | X           | Y           | Z          |
|------|-------------|-------------|------------|
| C    | 1.01634300  | -0.04846300 | 0.00000000 |
| C    | 2.60746700  | 1.75434000  | 0.00000000 |
| N    | 3.92561500  | 2.09267900  | 0.00000000 |
| H    | 4.13781500  | 3.07939700  | 0.00000000 |
| H    | 4.67817500  | 1.42286700  | 0.00000000 |
| N    | 1.72021400  | 2.71519700  | 0.00000000 |
| C    | 0.36638800  | 2.38944500  | 0.00000000 |
| O    | -0.50575500 | 3.25814900  | 0.00000000 |
| C    | 0.70815400  | -1.39673500 | 0.00000000 |
| C    | -0.64236700 | -1.81034400 | 0.00000000 |
| H    | 1.49975300  | -2.14697800 | 0.00000000 |
| C    | -1.32503900 | 0.54747000  | 0.00000000 |
| C    | -1.68173700 | -0.81876800 | 0.00000000 |
| H    | -2.08734900 | 1.32462000  | 0.00000000 |
| C    | 0.00000000  | 0.93933300  | 0.00000000 |
| N    | 2.33381400  | 0.41061900  | 0.00000000 |
| H    | 3.08633600  | -0.26794500 | 0.00000000 |
| C    | -1.00601700 | -3.18369800 | 0.00000000 |
| C    | -2.33146100 | -3.56115300 | 0.00000000 |
| H    | -0.22034200 | -3.93808100 | 0.00000000 |
| C    | -3.03835700 | -1.24131000 | 0.00000000 |
| C    | -3.35533600 | -2.58218500 | 0.00000000 |
| H    | -2.59513000 | -4.61631700 | 0.00000000 |
| H    | -3.82193300 | -0.48554300 | 0.00000000 |
| H    | -4.39701600 | -2.89427500 | 0.00000000 |

---

**Table S11.** Adenine (A)

---

Calculated energy (in Hartrees)= -465.94705721

---

| Atom | X           | Y           | Z          |
|------|-------------|-------------|------------|
| N    | -2.15072700 | 0.12906000  | 0.00000000 |
| C    | -1.90629800 | 1.47894600  | 0.00000000 |
| H    | -2.71140600 | 2.20310400  | 0.00000000 |
| N    | -0.61545400 | 1.78364100  | 0.00000000 |
| C    | 0.00000000  | 0.54736400  | 0.00000000 |
| C    | 1.35914600  | 0.17264500  | 0.00000000 |
| N    | 2.35303400  | 1.09016300  | 0.00000000 |
| H    | 3.31214000  | 0.77561900  | 0.00000000 |
| H    | 2.13618400  | 2.07562900  | 0.00000000 |
| N    | 1.67232800  | -1.13335000 | 0.00000000 |
| C    | 0.66248400  | -2.03283700 | 0.00000000 |
| H    | 0.97426900  | -3.07513600 | 0.00000000 |
| N    | -0.65923100 | -1.81786100 | 0.00000000 |
| C    | -0.92510300 | -0.50063200 | 0.00000000 |
| H    | -3.05221200 | -0.33370200 | 0.00000000 |

---

**Table S12.** Guanine (G)

---

Calculated energy (in Hartrees)= -540.99345585

---

| Atom | X           | Y           | Z          |
|------|-------------|-------------|------------|
| N    | -2.17314700 | 0.73436300  | 0.00000000 |
| C    | -1.83295800 | 2.06736500  | 0.00000000 |
| H    | -2.58196200 | 2.84872600  | 0.00000000 |
| N    | -0.52471700 | 2.26447100  | 0.00000000 |
| C    | 0.00000000  | 0.98937000  | 0.00000000 |
| C    | 1.37499700  | 0.56303300  | 0.00000000 |
| O    | 2.42012800  | 1.20302100  | 0.00000000 |
| N    | 1.42180900  | -0.86801500 | 0.00000000 |
| H    | 2.37168900  | -1.23106700 | 0.00000000 |
| C    | 0.35157100  | -1.73014400 | 0.00000000 |
| N    | 0.63350200  | -3.06395200 | 0.00000000 |
| H    | 1.57216900  | -3.42861500 | 0.00000000 |
| H    | -0.14509800 | -3.70474100 | 0.00000000 |
| N    | -0.90303500 | -1.33902100 | 0.00000000 |
| C    | -1.00287800 | 0.02113100  | 0.00000000 |
| H    | -3.10309200 | 0.33208300  | 0.00000000 |

---
